# Supplementary material for: Cytokinesis-required Cdc14 is a signaling hub of asexual development and multi-stress tolerance in Beauveria bassiana
Source: PubMed Central journal article supplement — Sci Rep. 2013 Oct 30;3:3086. doi: 10.1038/srep03086 (PMC3812655; doi:10.1038/srep03086), 2013-10-30
Supplement: srep03086-s1.pdf [file srep03086-s1.pdf]

**Running head:** Functions of fungal Cdc14

**Cytokinesis-required Cdc14 is a signaling hub of asexual development and multi-stress tolerance in *Beauveria bassiana***

**Jie Wang, Jing Liu <sup>†</sup>, Yue Hu <sup>†</sup>, Sheng-Hua Ying and Ming-Guang Feng <sup>\*</sup>**

Institute of Microbiology, College of Life Sciences, Zhejiang University, Hangzhou, Zhejiang, 310058, People's Republic of China

<sup>†</sup> These authors contribute equally to the study.

\* Corresponding author: M.-G. Feng, Institute of Microbiology, College of Life Sciences, Zhejiang University, Hangzhou, Zhejiang, 310058, People's Republic of China. Phone and fax: 86-571-88206178. E-mail: mgfeng@zju.edu.cn

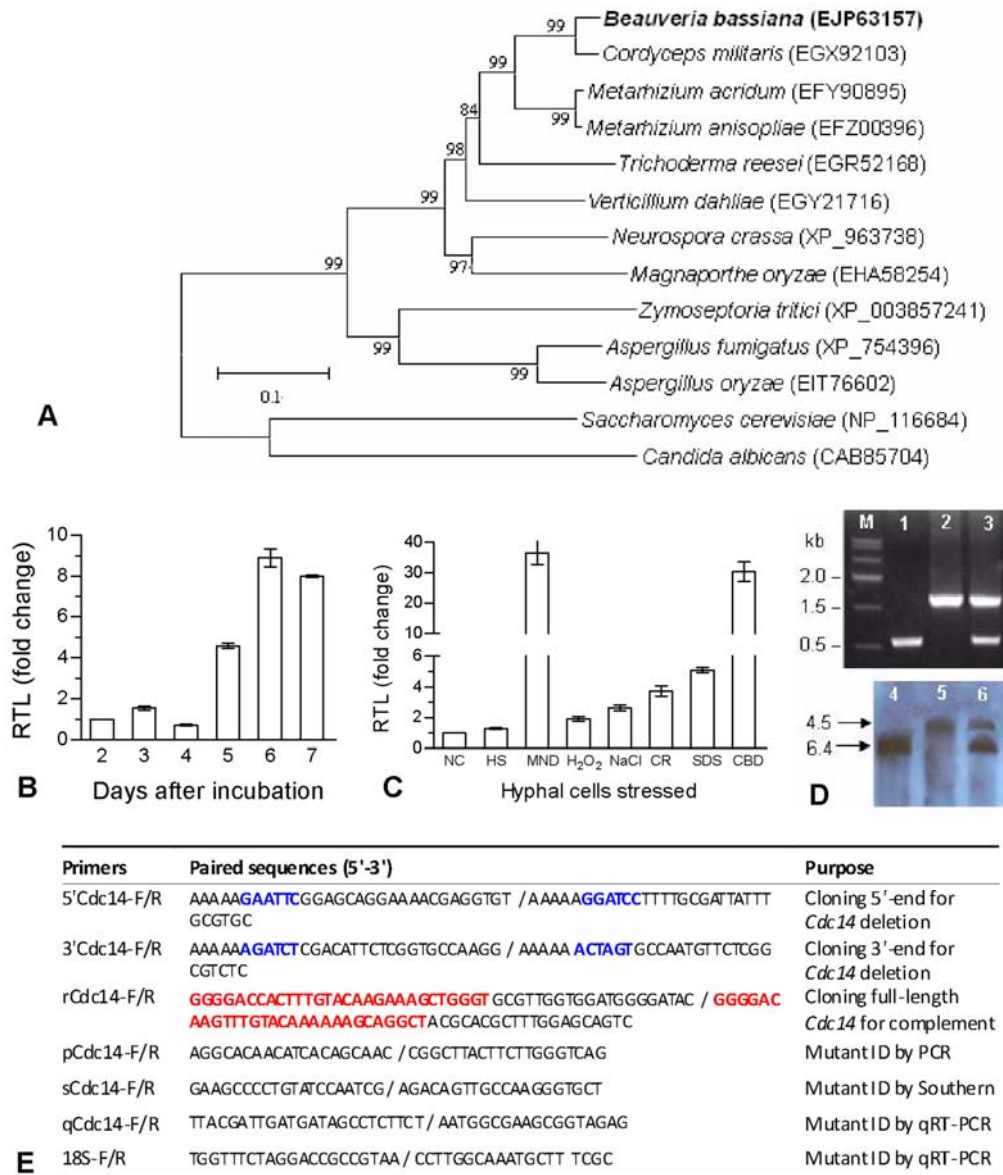

**Fig. S1.** Phylogenetic and transcriptional features of *B. bassiana* *Cdc14* and creation of its disruption and complemented mutants. (A) Phylogenetic tree for *Cdc14* orthologues in fungal and yeast species (NCBI accession codes in parentheses). Scale bar: branch length proportional to genetic distance assessed with neighbor-joining method. (B) Relative transcript levels (RTL) of *Cdc14* (assessed via qRT-PCR) in wild type during 7-day growth (versus day 2) on SDAY at 25°C. (C) RTL of *cdc14* in wild-type cultures grown for 3 days on 1/4 SDAY supplemented with menadione (MND, 0.2 mM), H<sub>2</sub>O<sub>2</sub> (2 mM), NaCl (0.8 M), Congo red (CR, 0.5 mg/ml), SDS (0.2 mg/ml) and carbendazim (CBD, 0.5 µg/ml) at 25°C respectively or exposed for 1 h to heat shock (HS) at 40°C (NC: normal culture not stressed). Error bars: SD. (D) Identification of *Cdc14* disruption and complement mutants via PCR (lanes 1–3) and Southern blotting (lanes 4–6). Lanes 1 and 4: wild type. Lanes 2 and 5:  $\Delta Cdc14$ . Lanes 3 and 6:  $\Delta Cdc14/Cdc14$ . (E) Paired primers used for the manipulation of *B. bassiana* *Cdc14* and the identification of its mutants (Blue: the sites of restriction enzymes *EcoRI/Bam*HI and *Bgl*II/*Spe*I. Red: fragments for gateway exchange).

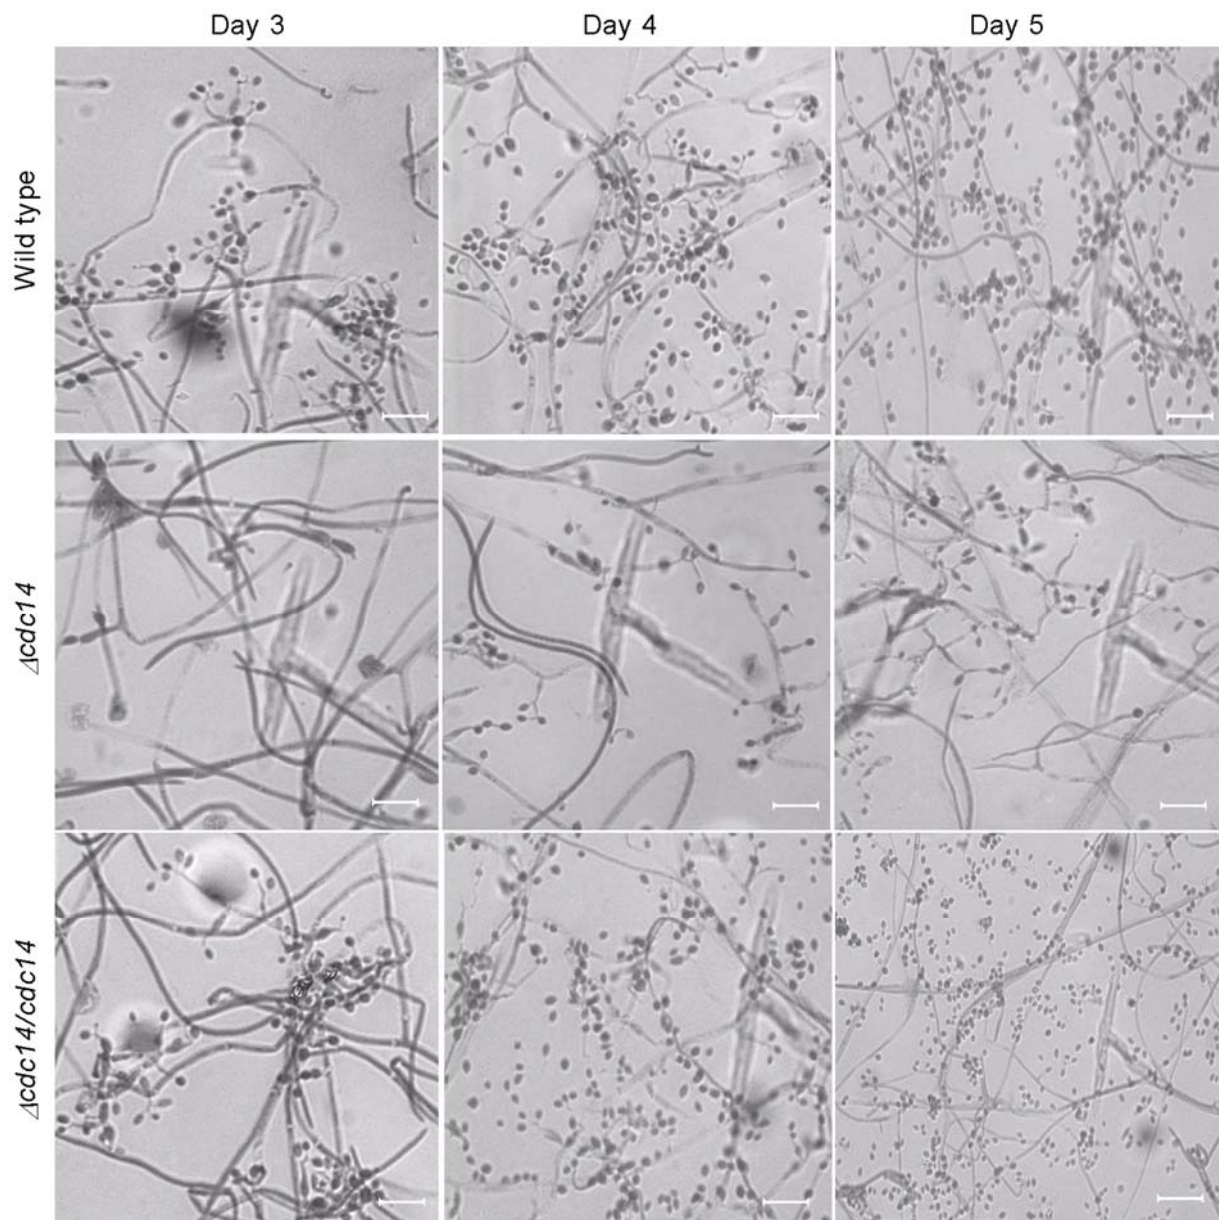

**Fig. S2.** Morphological comparison of colony samples taken during the conidiation of *B. bassiana* wild-type strain and *cdc14* mutants grown on SDAY plates at 25°C. Scale bars: 10  $\mu$ m.

**Table S1.** Paired primers used for assessing the transcript levels of 88 genes in the *Cdc14* disruption and complement mutants versus wild type of *B. bassiana* via qRT-PCR.

| Tag code*                                         | Gene         | Annotation                                                     | Sequences (5'-3') of paired primers                    |
|---------------------------------------------------|--------------|----------------------------------------------------------------|--------------------------------------------------------|
| <i>Involved in cytokinesis</i>                    |              |                                                                |                                                        |
| BBA_08543                                         | <i>wee1</i>  | WEE protein kinase                                             | CTCGTCTACCAGCATCTT / CACCTGTTCAACCTTGTGTC              |
| BBA_07180                                         | <i>mid1</i>  | calcium channel subunit                                        | ATGAATTACACAGACAAG / ACATATCGGTGATAGTAG                |
| BBA_01304                                         | <i>ace2</i>  | transcription factor                                           | CAAGAAGAAGACATTATGC / ATCATCATTCTGGAACAT               |
| BBA_03872                                         | <i>eng1</i>  | endo-1,3-beta-glucanase                                        | AACACCTACTACAATGAT / TAGTCCTTGTCTTATCG                 |
| BBA_01202                                         | <i>dse1</i>  | WD domain-containing protein                                   | ATCTCTACTGTTATTGTAAG / ATGATAATATCGGTGTCT              |
| BBA_01489                                         | <i>slil5</i> | inner centromere protein                                       | CTCCAGATTGTTCAAGCAGT / GTTTCGTTCTCATCAATATAC           |
| BBA_00440                                         | <i>ask1</i>  | subunit Ask1                                                   | CAAGCAGAAATATGAAATCG / TTTGTAATAGTTGGATGGT             |
| BBA_05079                                         | <i>ase1</i>  | microtubule associated protein                                 | AAGAAGGAAATGATTGAC / GGATAAGTTATTGTGATGT               |
| BBA_03315                                         | <i>cdc15</i> | CDC15 protein kinase                                           | AATCTACCAACTGCCTCAAC / GTCATATACACGCCAACAAAG           |
| BBA_03150                                         | <i>mob1</i>  | Mob1 family protein                                            | ATGAAGGCTACTGACGAATT / AGGTCATCAACTGCTCAAT             |
| BBA_08042                                         | <i>plo1</i>  | serine/threonine-protein kinase                                | CATCATCTCTTCAAGACAGT / ATCGTTGAGGATATAGCCAAG           |
| BBA_03681                                         | <i>spg1</i>  | septum-promoting GTP-binding protein 1                         | ATCAAGGAGTGGTATAGAC / ATCTTGGATTGAAAAGTTG              |
| BBA_02370                                         | <i>sid2</i>  | serine/threonine-protein kinase                                | CGACAGGAGTATCTATCTTG / AGAACATTTCCGCAATATAG            |
| BBA_04438                                         | <i>cbk1</i>  | Serine/threonine-protein kinase                                | CTTCCAGGACACTTACTTT / AATGTAGAAGCGAGTTATGT             |
| BBA_06124                                         | <i>cts1</i>  | CTP synthase                                                   | TATCTTGGCATTCTGCTCAG / CGGTCTTCCCTAAATAGTCTC           |
| BBA_08017                                         | <i>scw11</i> | cell wall glucanase                                            | AACATTTGGCAGCAGACT / TTGAAGAAGCGTGGATG                 |
| BBA_10084                                         | <i>hym1</i>  | conidiophore development protein hymA                          | AAGACCTTGTCCACGATAT / TTAATAGACTGACGCTTGGT             |
| BBA_04198                                         | <i>tao3</i>  | cell morphogenesis protein                                     | CCTTGTCAAATATCTCATT / ATCTGTAATATGGATGTTG              |
| <i>Involved in growth and asexual development</i> |              |                                                                |                                                        |
| BBA_04942                                         | <i>fluG</i>  | developmental protein                                          | CCTCCCTAGTTTGGTCGCTTCTC / CGTGTGCGGTAATCTGCTCCTC       |
| BBA_02968                                         | <i>flbA</i>  | developmental regulator                                        | CCAATCCACTCGCCGCTCTC / CGGAGGAAAGAGAATCGGTAGAGG        |
| BBA_06988                                         | <i>flbB</i>  | bZIP transcription factor                                      | GCACTGACACGCCACAAGAGC / CCGCCGCCGAAGCCTGTTG            |
| BBA_03181                                         | <i>flbC</i>  | C <sub>2</sub> H <sub>2</sub> conidiation transcription factor | TCCATCTCCAACCTGCTGGTCTC / GGCGCGTAGGCGGAAGG            |
| BBA_07259                                         | <i>flbD</i>  | MYB conidiophore development protein                           | CGGCAAGCGATGGGCAGAGATTG / ACGAGCAAGGTGACGGTAGAGGTG     |
| BBA_06599                                         | <i>hyd1</i>  | hydrophobin                                                    | TTCTCAGCGATCTTGATCTT / GCACTTGTGTGCGATTGG              |
| BBA_03015                                         | <i>hyd2</i>  | class I hydrophobin                                            | CATGGTGGAAGGATCTG / ATCTTGGTCGCTTCTCG                  |
| BBA_10084                                         | <i>hymA</i>  | conidiophore development protein                               | TCGCAAGATGGTTCAGTA / GGACAAGAAGTAAGAAGTT               |
| <i>Involved in response to oxidative stress</i>   |              |                                                                |                                                        |
| BBA_02311                                         | <i>sod1</i>  | Cu/Zn superoxide dismutase                                     | GCGGCTTCCACATCCACACCTTTG / GGTCCAGCGTTGCCAGTCTTGAG     |
| BBA_09706                                         | <i>sod2</i>  | cytosol Mn-superoxide dismutase                                | CCAGTGTGGCATTGACATG / TCAGCCGCTTCCAGTTGATG             |
| BBA_09382                                         | <i>sod3</i>  | mitochondrial Mn-superoxide dismutase                          | TCTCCGGCAAGATTATGGAGC / TTGGCGTCACTTCTGGCCT            |
| BBA_04317                                         | <i>sod4</i>  | superoxide dismutase                                           | CGAGATGGCTTACGGCTTCTCAG / GCTCCCAGGTGTTGAGGCATAG       |
| BBA_01984                                         | <i>sod5</i>  | superoxide dismutase                                           | CGGCGACCTCAGCGCAAGTAC / GCCAGCAACAACAGGGACCGTAGG       |
| BBA_05603                                         | <i>cat1</i>  | catalase B                                                     | CCTCTGACGTTGGCGCCCTTTC / CCGTGTCCGTGCTGCCTCGTG         |
| BBA_06186                                         | <i>cat2</i>  | catalase A                                                     | CCGTCTGGGCATCAACTGGGAAG / GCTGGGCGTGGTCTGGTATG         |
| BBA_06567                                         | <i>cat3</i>  | Catalase                                                       | TCAAGTCGGTTCAGGAGATGGAG / TTGTTGCTCTTCAATCGGAGTG       |
| BBA_09109                                         | <i>cat4</i>  | catalase C                                                     | GAGGAGCCCAGCAACGCACAAGAG / CTGAGGACGACAAGGCCCCATTC     |
| BBA_09338                                         | <i>cat5</i>  | catalase P                                                     | GCTGGGCTGATCTGCTGGTCTTCTG / TCCTTGTCTGTAACGGTGGCTGTCTG |
| BBA_09760                                         | <i>cat6</i>  | catalase D                                                     | CGGCTCGGTGTCTTGTCCATAC / CCTTGTGCGGCTTCTGGCGAAG        |
| BBA_08024                                         | <i>pod1</i>  | cytochrome c peroxidase                                        | GCCGCCGCTTCTACTCGTCTG / CGTTGCTGCCGCCAGTACCG           |
| BBA_00792                                         | <i>pod2</i>  | peroxidase                                                     | CCGCCAGAATGCCGCCGAGTG / GAATGATGGGTCCGCCGAGGAG         |
| BBA_08023                                         | <i>pod3</i>  | NADH oxidase                                                   | CACACGCACCGACGACTACG / GTTCCGCCGCTGCTGAC               |
| <i>Involved in cell wall integrity</i>            |              |                                                                |                                                        |
| BBA_09307                                         | <i>chn1</i>  | acidic chitinase endochitinase 1                               | TGACAACTCGCTTATCAGT / TTATCATACTTGGTCTCAGGAT           |
| BBA_05353                                         | <i>chn2</i>  | class III chitinase                                            | GCAATTTGACTACCTCTG / CGTATTGGCAATGTTCTT                |

|           |              |                                          |                                                     |
|-----------|--------------|------------------------------------------|-----------------------------------------------------|
| BBA_02017 | <i>chn3</i>  | chitinase 3                              | CGGCTCATCATACTACC / AATGTCGGGCTGCGTAAT              |
| BBA_06297 | <i>chn4</i>  | class III chitinase, chitinase 4         | TGAATGGCATAAATCCTG / CGTCTTGATGTCCTCTTC             |
| BBA_09585 | <i>chn5</i>  | chitinase 5                              | AATCTGGTTACTGTGGTT / TTTGGAGGATCTGAGAAC             |
| BBA_09259 | <i>chn6</i>  | symbiotic chitinase                      | CAGATGTGAATAATCCAATG / AAGAATATGAGCCAAGTTAG         |
| BBA_02230 | <i>chn7</i>  | chitinase                                | GTATCAACTACCTCAAGT / TCATATAGACAAATGTAATCG          |
| BBA_08982 | <i>chn8</i>  | class V chitinase                        | TAATGCTAATGCCACTTATG / AGAGATATTGATGCGTTTGT         |
| BBA_00297 | <i>chn9</i>  | class V chitinase                        | TACATCTCCAATGCTGAAATC / CCACTGGTCTTGTCGTAT          |
| BBA_03814 | <i>chn10</i> | chitinase                                | AATGTATACTCTACCGTCAG / CTTGCTGGAAATGTAACCTT         |
| BBA_06317 | <i>chn11</i> | chitinase                                | GACCATTGTGCCGATTCT / GGTGGACAGGGTGTATTATG           |
| BBA_04667 | <i>chs1</i>  | chitin synthase 1                        | ACCTATATCAACATTCTC / GACAATCTCATTCTTCTC             |
| BBA_03236 | <i>chs2</i>  | chitin synthase 2                        | TGTGTCTTACTGATTGCT / TAATGATGGCGTAGATGAT            |
| BBA_03590 | <i>chs3</i>  | chitin synthase 2                        | TCTTCAACACCGTCAACAT / TCCTACCGAGCAAGTCTT            |
| BBA_08043 | <i>chs4</i>  | chitin synthase 4                        | CAGTCAGATTATCCTTATGTCAT / GATATACCAGTCACCTTCC       |
| BBA_02360 | <i>chs5</i>  | chitin biosynthesis protein              | ATGAGAGCGTGATTGAAG / CTGCTTTTCTTTTCTC               |
| BBA_06858 | <i>chs6</i>  | chitin synthase 6                        | TGGAATTGTATCAAGAACT / GAGAATAATGGCAGAGAT            |
| BBA_03793 | <i>chs7</i>  | chitin synthase chaperone-like protein   | CGTAATGATGGTCTACAAG / CTCCTCAGGAAGTAACTC            |
| BBA_06859 | <i>chs8</i>  | class V chitin synthase                  | GACTACAAGAACAACAAC / ACGAGTATCATTGGTATAG            |
| BBA_08396 | <i>chs9</i>  | chitin synthase                          | CAACAAGAAGAAGCCAAG / ATAATGACGAGTCCACTAAT           |
| BBA_07346 | <i>chs10</i> | class VII chitin synthase                | CCTCTTTATTCTTTTATCG / GGTTGTTGATGTAATGAC            |
| BBA_06846 | <i>chs11</i> | class VII chitin synthase                | GGAGATTATGGAAGCGAT / TAGACAATAGTGCGATGAC            |
| BBA_06144 | <i>mhp1</i>  | cell wall biogenesis protein             | GGACCAACTCCATACCACAAGC / GCTCACCGATAGGACACCGTTCTC   |
| BBA_06689 | <i>ssd1</i>  | cell wall biogenesis protein phosphatase | GCTCTCCCACCGTCGCAACCAATC / CACCTCCACCACCCCTTCCACCTC |

*Involved in response to osmotic stress*

|           |             |                                            |                                                   |
|-----------|-------------|--------------------------------------------|---------------------------------------------------|
| BBA_08887 | <i>sho1</i> | high osmolarity signaling protein          | AGCGTCAACAACCTCGTCTAC / AGGCGTGGAGTTCTCAAAG       |
| BBA_02191 | <i>sln1</i> | sensor histidine kinase/response regulator | TCGGTGCCATCACTCCTTCCAACG / GCGGACGAGCAATGCCAACAGC |
| BBA_02621 | <i>ssk1</i> | two-component response regulator           | AGAACTTTAGCACCGAGCCCTTTC / AGAAGCAGCAGCAGACGATTGG |
| BBA_07057 | <i>ypd1</i> | phosphotransmitter protein                 | TGACCAGGTCGAGGAGACGTTTGC / TCGGCGTCGGGTTCTGATGAGC |
| BBA_00971 | <i>msn2</i> | stress response element binding protein    | GCCCCCAGCCCATCTAC / ACCGAGGTCTCAACCGAGTCAAAC      |

*Involved in signal transduction pathways*

|           |              |                                       |                                                     |
|-----------|--------------|---------------------------------------|-----------------------------------------------------|
| BBA_05916 | <i>pkA</i>   | cAMP-dependent protein kinase subunit | GCATCCGAGCAGCAGAAC / GCTTGACTGAACGAGGTGAAC          |
| BBA_07006 | <i>pkC</i>   | protein kinase C                      | ATTGAAGAGATATGAAGAAC / AAGATTCCGAGTATTGAT           |
| BBA_04261 | <i>snf1</i>  | Protein kinase                        | GCGAGAGGAACATATAGC / GGATTACGACTAGCATT              |
| BBA_04387 | <i>ras1</i>  | Ras GTPase protein                    | GGCGGTGGCGTGGTAAATC / TGCGGGGAGGTGATGGAGTAG         |
| BBA_04671 | <i>ras2</i>  | Ras GTPase protein                    | CCTCGGTGACGGTGGTGTAG / GACTCCTTGACTCGTGAATCTG       |
| BBA_01318 | <i>bck1</i>  | MAP kinase kinase kinase (Bck1)       | GACGCCTGATTACCTCTAACAC / CCTGACGCTGATTCTTGGAC       |
| BBA_00937 | <i>sskB</i>  | MAP kinase kinase kinase (SskB)       | GCAGAAGCACTCGGCACCATTTTC / GCGTTGCGGAAGAGGATCGGACTG |
| BBA_02280 | <i>ste11</i> | MAP kinase kinase kinase (Ste11)      | TATGCTTAACTCGTATGGT / TCGTGGAGATATGACAGA            |
| BBA_01095 | <i>mkk1</i>  | MAP kinase kinase (Mkk1)              | CCGCCGACCTCAGATTCC / CGGTTGACCACCTTGAGAGACAG        |
| BBA_04254 | <i>mkk2</i>  | MAP kinase kinase (Mkk2)              | GCCGAGAACC GCCCAGACTTTG / TGCTCACAGTGCCGCCGTTTC     |
| BBA_02330 | <i>pbs2</i>  | MAP kinase kinase (Pbs2)              | CGCTCAATGCCGATGTCTTG / GGCTGAGTTGATATGCTTGAC        |
| BBA_01660 | <i>mkk4</i>  | MAP kinase kinase (Mkk4)              | GAGGCGACTGAGGAGGACTGAG / CGGCAGAGGACGGACCAAGAG      |
| BBA_05588 | <i>Mkk5</i>  | MAP kinase kinase (Mkk5)              | TTCTCAGACAGCACCAAT / GGCAGACTCTCATAATGTAT           |
| BBA_01244 | <i>mpk1</i>  | MAP kinase (Mpk1)                     | CTGCTCTCAACGCCAATG / GCTGGTGGTATAATCCTTGCC          |
| BBA_03334 | <i>slt2</i>  | MAP kinase (Slit2)                    | ACCGACGCACACTTTCAATCCTTC / GCCCACAGACCACATCAATAGC   |
| BBA_04298 | <i>maf1</i>  | MAP kinase (Maf1)                     | CGTTCTGTTGTGCCCGTCAATTC / CCGCCAATCTCATCGTCTCTCC    |
| BBA_05209 | <i>hog1</i>  | MAP kinase (Hog1)                     | GGCTGGCGTCTTCATCGTGACC / AAGGGCTTCCGTCGAGCATCTC     |
| BBA_09043 | <i>sty1</i>  | MAP kinase (Sty1)                     | ATCGCAGGCTCGAAATACG / GGCTGGCTGGCTGTTATCC           |

\* Gene accession codes in the annotated genome of *B. bassiana* under the NCBI accession ADAH00000000.
